# Supplementary material for: Valence tautomerism in a cobalt-verdazyl coordination compound
Source: Royal Society of Chemistry journal article supplement (doi:10.1039/d0cc01770a), 2020-01-01
Supplement: d0cc01770a1.pdf [file d0cc01770a1.pdf]

# Valence Tautomerism in a Cobalt-Verdazyl Coordination Compound.

*Connor Fleming<sup>a</sup>, Dorothy Chung<sup>a</sup>, Servando Ponce<sup>a</sup>, David J. R. Brook<sup>\*a</sup>, Jeffrey DaRos<sup>a</sup>, Raja Das<sup>b</sup>, Andrew Ozarowski<sup>c</sup>, and Sebastian A Stoian<sup>d</sup>*

## ***Supporting Information:***

<sup>a</sup>Department of Chemistry, San Jose State University, One Washington Square, San Jose, CA 95126, USA.

<sup>b</sup>Department of Physics, University of South Florida, Tampa, Florida 33620, USA

<sup>c</sup>National High Magnetic Field Laboratory, Florida State University, 1800 E. Paul Dirac Drive, Tallahassee, FL 32310, USA.

<sup>d</sup>Department of Chemistry, University of Idaho, 875 Perimeter Drive, Moscow, ID 83844, USA.

CCDC numbers 1885262, 1885263

## Table of Contents

|                                                                                                                             |   |
|-----------------------------------------------------------------------------------------------------------------------------|---|
| I. Synthetic Details.....                                                                                                   | 3 |
| II. $^1\text{H}$ and $^{13}\text{C}$ NMR of $[\text{Co}(\text{dipyvd})_2](\text{PF}_6)$ in acetonitrile- $\text{d}_3$ ..... | 5 |
| III. HF EPR spectra of $[\text{Co}(\text{dipyvd})_2](\text{PF}_6)_2$ .....                                                  | 6 |
| IV. Calculated and Observed X-ray powder diffraction patterns .....                                                         | 7 |
| V. Cyclic voltammetry.....                                                                                                  | 7 |
| VI Fit of the low-temperature magnetic susceptibility data recorded for $[\text{Co}(\text{dipyvd})_2](\text{PF}_6)_2$ ..... | 9 |

## I. Synthetic Details

### General Experimental Details

1,3-di-(2'-pyridyl)-5-isopropyl-6-oxo-4H-tetrazine was synthesized as previously described. Cobalt triflate was synthesized from cobalt metal and triflic acid in acetonitrile. NMR spectra are referenced to internal solvent peaks.

### $[\text{Co}(\text{dipyvd})_2]^+\text{PF}_6^-$

1,3-di-(2'-pyridyl)-5-isopropyl-6-oxo-4H-tetrazine (120 mg, 0.4 mmol) was dissolved in 5 mL acetonitrile. To this was added a solution of cobalt(II) triflate (87 mg, 0.2 mmol) in 1 mL acetonitrile. The solution immediately turned greenish brown and then turned deep green upon stirring in air for ~10 min. The solution was evaporated and the deep green residue redissolved in 10 mL methanol. To this was added excess ammonium hexafluorophosphate dissolved in methanol, followed by the addition of 5 mL water. The resulting deep green precipitate was removed by filtration and dried under vacuum. (127 mg, 0.16 mmol, 80%) The precipitate was purified by diffusion of ether into an acetonitrile solution to give very dark green needle shaped crystals containing one equivalent of diethyl ether solvate.  $^1\text{H-NMR}$  (300 MHz;  $\text{CD}_3\text{CN}$ ):  $\delta$  8.42 (dd,  $J = 5.7, 0.5$  Hz, 1H), 8.17-8.09 (m, 2H), 8.06 (dd,  $J = 7.6, 1.7$  Hz, 1H), 7.98 (td,  $J = 7.6, 1.3$  Hz, 1H), 7.70 (ddd,  $J = 8.8, 7.2, 1.6$  Hz, 1H), 7.50 (ddd,  $J = 7.6, 5.7, 1.7$  Hz, 1H), 6.86 (ddd,  $J = 7.2, 6.2, 1.1$  Hz, 1H), 5.04 (quintet,  $J = 6.6$  Hz, 1H), 3.43 (q,  $J = 7.0$  Hz, 4H,  $\text{Et}_2\text{O}$  solvate) 1.53 (d,  $J = 6.6$  Hz, 6H), 1.14 (t,  $J = 7.0$  Hz, 6H,  $\text{Et}_2\text{O}$  solvate).  $^{13}\text{C}$  NMR ( $\text{CD}_3\text{CN}$ ) 155.0, 154.92, 153.14, 150.55, 147.26, 146.24, 141.43, 140.92, 128.74, 124.14, 120.45, 114.81, 65.83 ( $\text{Et}_2\text{O}$ ), 48.33, 20.20, 15.18 ( $\text{Et}_2\text{O}$  solvate); IR(ATR) 1685  $\text{cm}^{-1}$  (C=O); UV-vis ( $\text{CH}_3\text{CN}$ )  $\lambda_{\text{max}}$  632 nm ( $\epsilon=1350$ ); ESMS  $m/z=649$ ; calcd. for  $\text{C}_{34}\text{H}_{40}\text{CoF}_6\text{N}_{12}\text{O}_3\text{P}$ : C, 47.01; H, 4.64; N, 19.35; found: C 47.44 H 3.99 N 19.49.

A crystal for study by X-ray diffraction was grown by layering n-octane onto a solution of this material in dichloromethane. Data was collected through the Service Crystallography at the Advanced Light Source (SCrALS) program at Lawrence Berkeley National Laboratory. Intensity data were collected at 150K on a D8 goniostat equipped with a Bruker PHOTON-II detector at Beamline 11.3.1 at the Advanced Light Source (Lawrence Berkeley National Laboratory) using synchrotron radiation tuned to  $\lambda=0.7749\text{\AA}$ . For data collection 2-s frames were measured at 0.5° intervals of  $\omega$ . The data frames were collected using the program APEX3<sup>22</sup> and processed using the SAINT<sup>23</sup> routine within APEX3. The data were corrected for absorption and beam corrections based on the multi-scan technique as implemented in SADABS.<sup>24</sup> Solution and refinement used the program Olex2 along with the SHELX software suite. Crystal data:  $\text{C}_{31}\text{H}_{32}\text{Cl}_2\text{CoF}_6\text{N}_{12}\text{O}_2\text{P}_1$ , Monoclinic,  $a=11.2862(6)$ ,  $b=17.875(1)$ ,  $c=20.4254(12)$ ,  $\beta=86.479(2)$ ,  $V=4112.79$ ,  $Z=2$ , space group  $P2_1/a$  (No. 14). 151425 reflections were measured, of which 9047 were unique. ( $R_{\text{int}}=0.045$ ). Solution and refinement gave  $R(F)=0.054\%$  ( $F > 2\sigma(F)$ )  $R_w(F^2)=0.1745$  (all reflections). Details of data collection, solution, and refinement are included in the supporting information in .cif format.

### **[Co(dipyvd)<sub>2</sub>]<sup>2+</sup>(PF<sub>6</sub><sup>-</sup>)<sub>2</sub>**

[Co(dipyvd)<sub>2</sub>]<sup>+</sup>PF<sub>6</sub><sup>-</sup>•Et<sub>2</sub>O (150 mg, 0.17 mmol) was dissolved in 5 mL dichloromethane. To the resulting solution was added a solution of AgPF<sub>6</sub> (50 mg, 0.19 mmol) in 1 mL dichloromethane. A dark green precipitate formed immediately and was removed by filtration. The precipitate (177 mg, 0.16 mmol 95%) containing both [Co(dipyvd)<sub>2</sub>]<sup>2+</sup>(PF<sub>6</sub><sup>-</sup>)<sub>2</sub> and metallic silver, was characterized before further purification: Elemental analysis gave: C 33.99, H 2.60, N 15.49 consistent with 1.2 equivalents of silver (calcd. for C<sub>30</sub>H<sub>30</sub>CoN<sub>12</sub>O<sub>2</sub>•(PF<sub>6</sub>)<sub>2</sub>•Ag<sub>1.2</sub>: C 33.71, H 2.83, N 15.72). X-ray powder diffraction (Cu K<sub>α</sub> radiation) confirmed the presence of metallic silver and gave diffraction lines consistent with a tetragonal unit cell (*a*=15.84 Å, *c*=15.37 Å); IR (ATR) 1725 cm<sup>-1</sup> (C=O stretch); magnetic susceptibility was recorded on this mixture from 5-300K. The precipitate was redissolved in acetone and filtered to remove silver. Ether was allowed to diffuse into the acetone solution precipitating a crystalline product. IR(ATR) 1725 (C=O) cm<sup>-1</sup>;  $\chi T$  (298K)=1.4; HRMS *m/z*=649.1941, calculated for [C<sub>30</sub>H<sub>30</sub>CoN<sub>12</sub>O<sub>2</sub>]<sup>+</sup>: *m/z*=649.1947; anal. calcd for C<sub>30</sub>H<sub>30</sub>CoN<sub>12</sub>O<sub>2</sub>•(PF<sub>6</sub>)<sub>2</sub>: C 38.35, H 3.22, N 17.89; found: C 38.59, H 3.05, N 17.35; A single crystal was isolated and characterized by X-ray diffraction giving cell dimensions consistent with the earlier precipitate. Data was collected through the Service Crystallography at Advanced Light Source (SCrALS) program at Lawrence Berkeley National Laboratory. Intensity data were collected at 150K on a D8 goniostat equipped with a Bruker PHOTON-II detector at Beamline 11.3.1 at the Advanced Light Source (Lawrence Berkeley National Laboratory) using synchrotron radiation tuned to  $\lambda$ =1.0333 Å. For data collection 1 s frames were measured at 0.5° intervals of  $\omega$ . The data frames were collected using the program APEX3<sup>22</sup> and processed using the SAINT<sup>23</sup> routine within APEX3. The data were corrected for absorption and beam corrections based on the multi-scan technique as implemented in SADABS.<sup>24</sup> Solution and refinement used the program Olex2 along with the SHELX software suite. Crystal data: C<sub>30</sub>H<sub>30</sub>CoF<sub>12</sub>N<sub>12</sub>O<sub>2</sub>P<sub>2</sub>, Tetragonal, *a*=15.7805(4), *c*=15.4465(14), *V*=3846.6(4), *Z*=4, space group *P*-42<sub>1</sub>*c* (No. 114). 40042 reflections were measured, of which 3945 were unique. (*R*<sub>int</sub> = 0.0392). Solution and refinement gave *R*(*F*)=0.0465 (*F*> 2 $\sigma$ (*F*)) *wR*(*F*<sup>2</sup>)=0.1323 (all reflections). Details of data collection, solution, and refinement are included in the supporting information in .cif format.

## II. $^1\text{H}$ and $^{13}\text{C}$ NMR of $[\text{Co}(\text{dipyvd})_2](\text{PF}_6)$ in acetonitrile- $d_3$

Mar22-2017-Dbrook127-16a#3.10.fid  
Co(dipyvd)-green crystalline

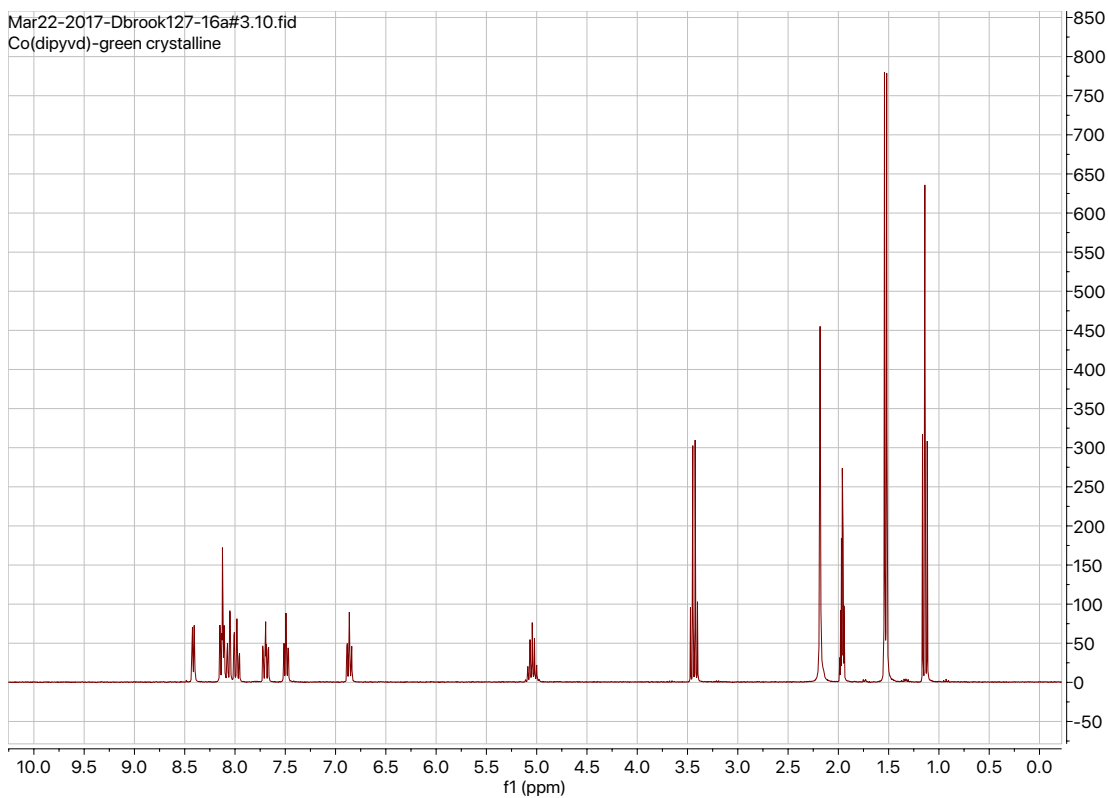

Mar22-2017-Dbrook127-16a#3.14.fid  
Co(dipyvd)-green crystalline

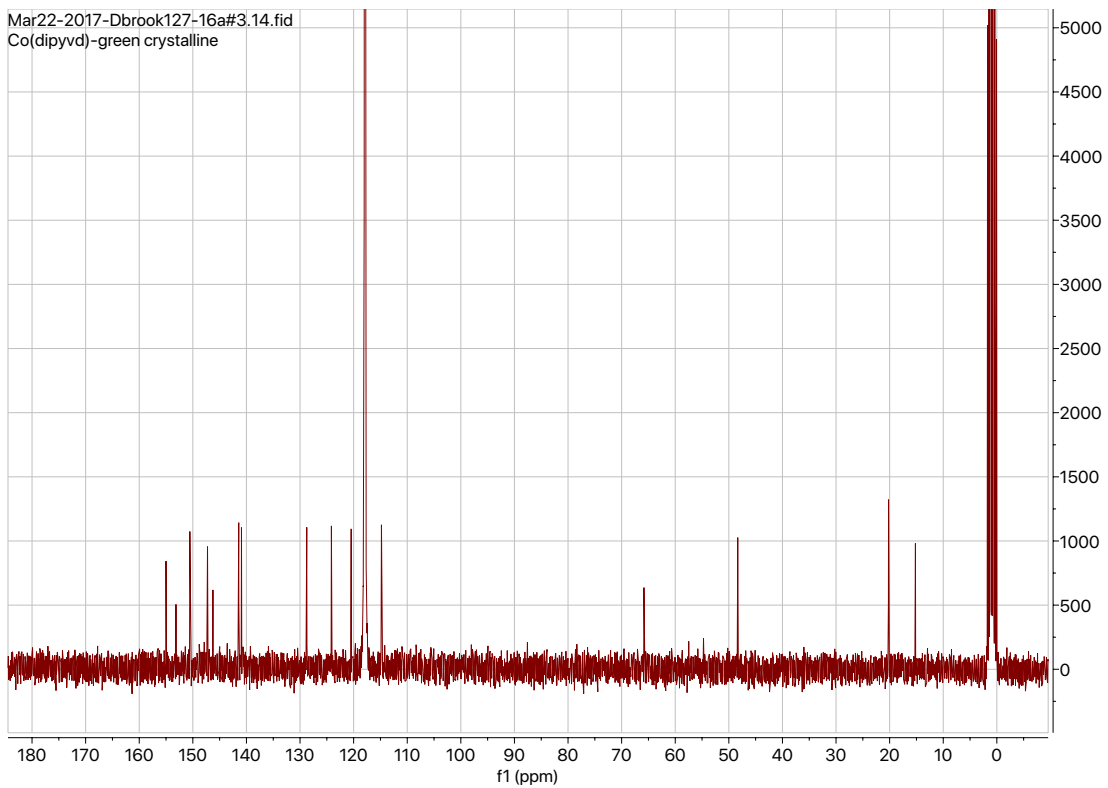

### III. HF EPR spectra of $[\text{Co}(\text{dipyvd})_2](\text{PF}_6)_2$

The frequency-dependent, high-field EPR spectra of  $[\text{Co}(\text{dipyvd})_2](\text{PF}_6)_2$  were recorded at 5 K using a home-built, transmission-type spectrometer which does not require a resonant cavity.<sup>1</sup> This instrument is operated by the EMR facility at the NHMFL. The instrument is fitted with an Oxford Instruments, liquid helium-cooled superconducting magnet which was used to generate magnetic fields of up to 17 T. Microwaves with frequencies ranging from 50 to 450 GHz were generated using a phase-locked Virginia Diodes source that produced a base frequency of  $13 \pm 1$  GHz, which was subsequently multiplied using a cascade of frequency multipliers. "The simulation of the X-band EPR spectra and the EPR figures were obtained using the SpinCount program written by Prof. Mike Hendrich at Carnegie Mellon University."

<sup>1</sup> Hassan, A.; Pardi, L.; Krzystek, J.; Sienkiewicz, A.; Goy, P.; Rohrer, M.; Brunel, L.-C. Ultrawide Band Multifrequency High-Field EMR Technique: A Methodology for Increasing Spectroscopic Information. *J. Magn. Reson.* **2000**, *142* (2), 300–312

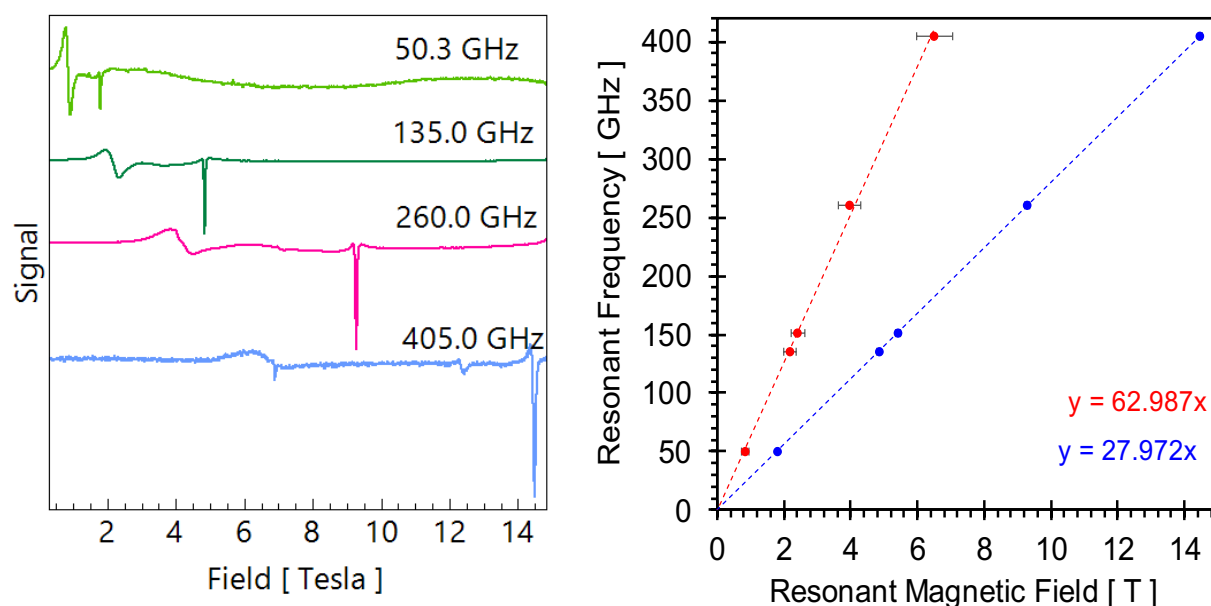

*Left:* Frequency-dependent spectra recorded at 5 K for a neat powder spectrum of **1**. The modulation - induced phase distortion of the 135- 450 GHz spectra was corrected using a Hilbert transform procedure. *Right:* The magnetic field vs. microwave frequency dependence of the observed resonances. The horizontal error bars indicate the FWHM linewidth of the observed resonance. The linear fits of these dependencies yield an effective g-value of 4.500 (for the red curve) and 1.998 (for the blue curve), respectively.

#### IV. Calculated and Observed X-ray powder diffraction patterns

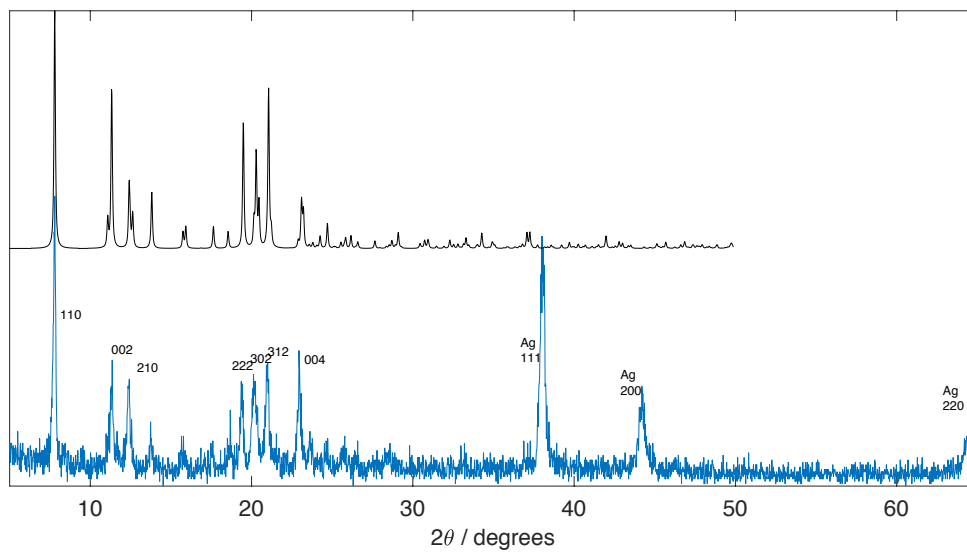

Top: Calculated X-ray powder diffraction pattern (Cu-K $\alpha$ ) for solid  $[\text{Co}(\text{dipyvd})_2](\text{PF}_6)_2$  based on the single crystal X-ray diffraction data. Bottom: Observed powder pattern for freshly synthesized samples of  $[\text{Co}(\text{dipyvd})_2](\text{PF}_6)_2$ , co-precipitated with metallic silver.

## V. Cyclic voltammetry

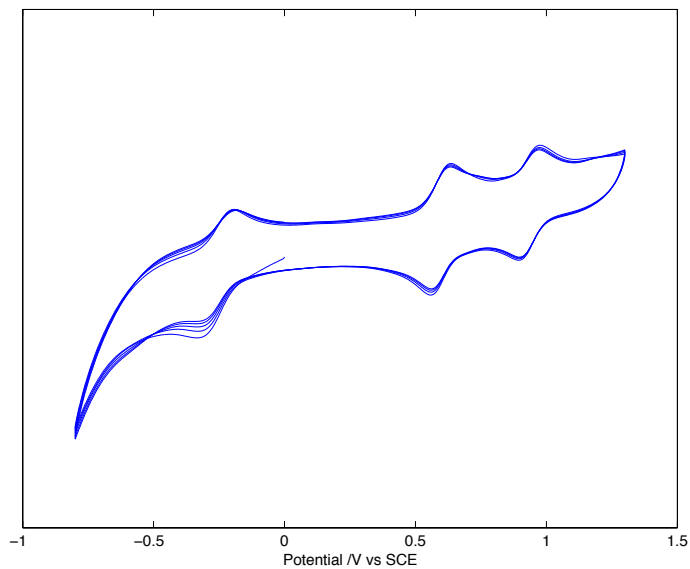

Cyclic voltammetry of  $[\text{Co}(\text{dipyvd})_2]^{n+}$  in acetonitrile with 0.1 M  $\text{Bu}_4\text{NPF}_6$  as supporting electrolyte. Potentials were measured with respect to a  $\text{Ag}/\text{AgCl}$  pseudoreference electrode calibrated with ferrocene. Potentials are reported vs SCE assuming the ferrocene/ferrocenium couple is at 0.4 V vs SCE.



## VI Fit of the low-temperature magnetic susceptibility data recorded for $[\text{Co}(\text{dipyvd})_2](\text{PF}_6)_2$

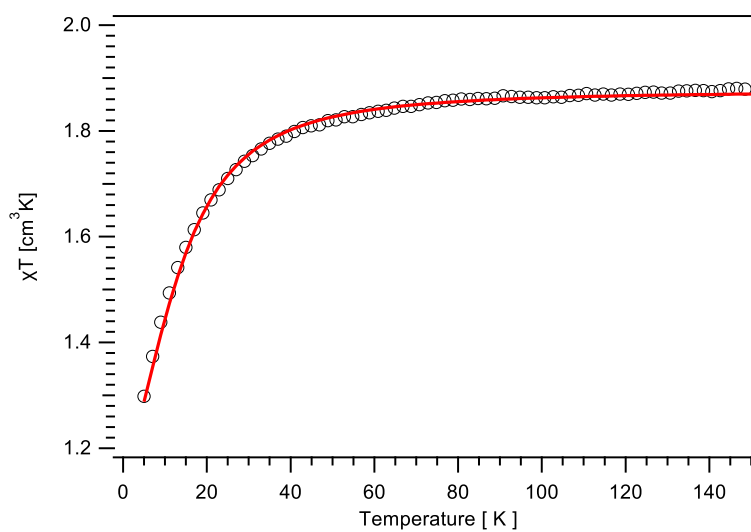

Best fit of the  $\chi T$  data obtained using a single-site,  $S = 3/2$  spin-Hamiltonian. The theoretical red trace was obtained using  $D = 16 \text{ cm}^{-1}$ ,  $E/D = 0.05$ ,  $g_{\text{iso}} = 2.0$ , and  $\text{TIP} = 200 \cdot 10^{-6} \text{ cm}^3$
